# Supplementary figures and images for: A Multiple-City RCT of Housing First With Assertive Community Treatment for Homeless Canadians With Serious Mental Illness
Source: Atypon-hosted journal article supplement (doi:10.1176/appi.ps.201400587), 2015-12-01

# CONSORT: Diagram Screening, Randomization, and Follow-up of Participants

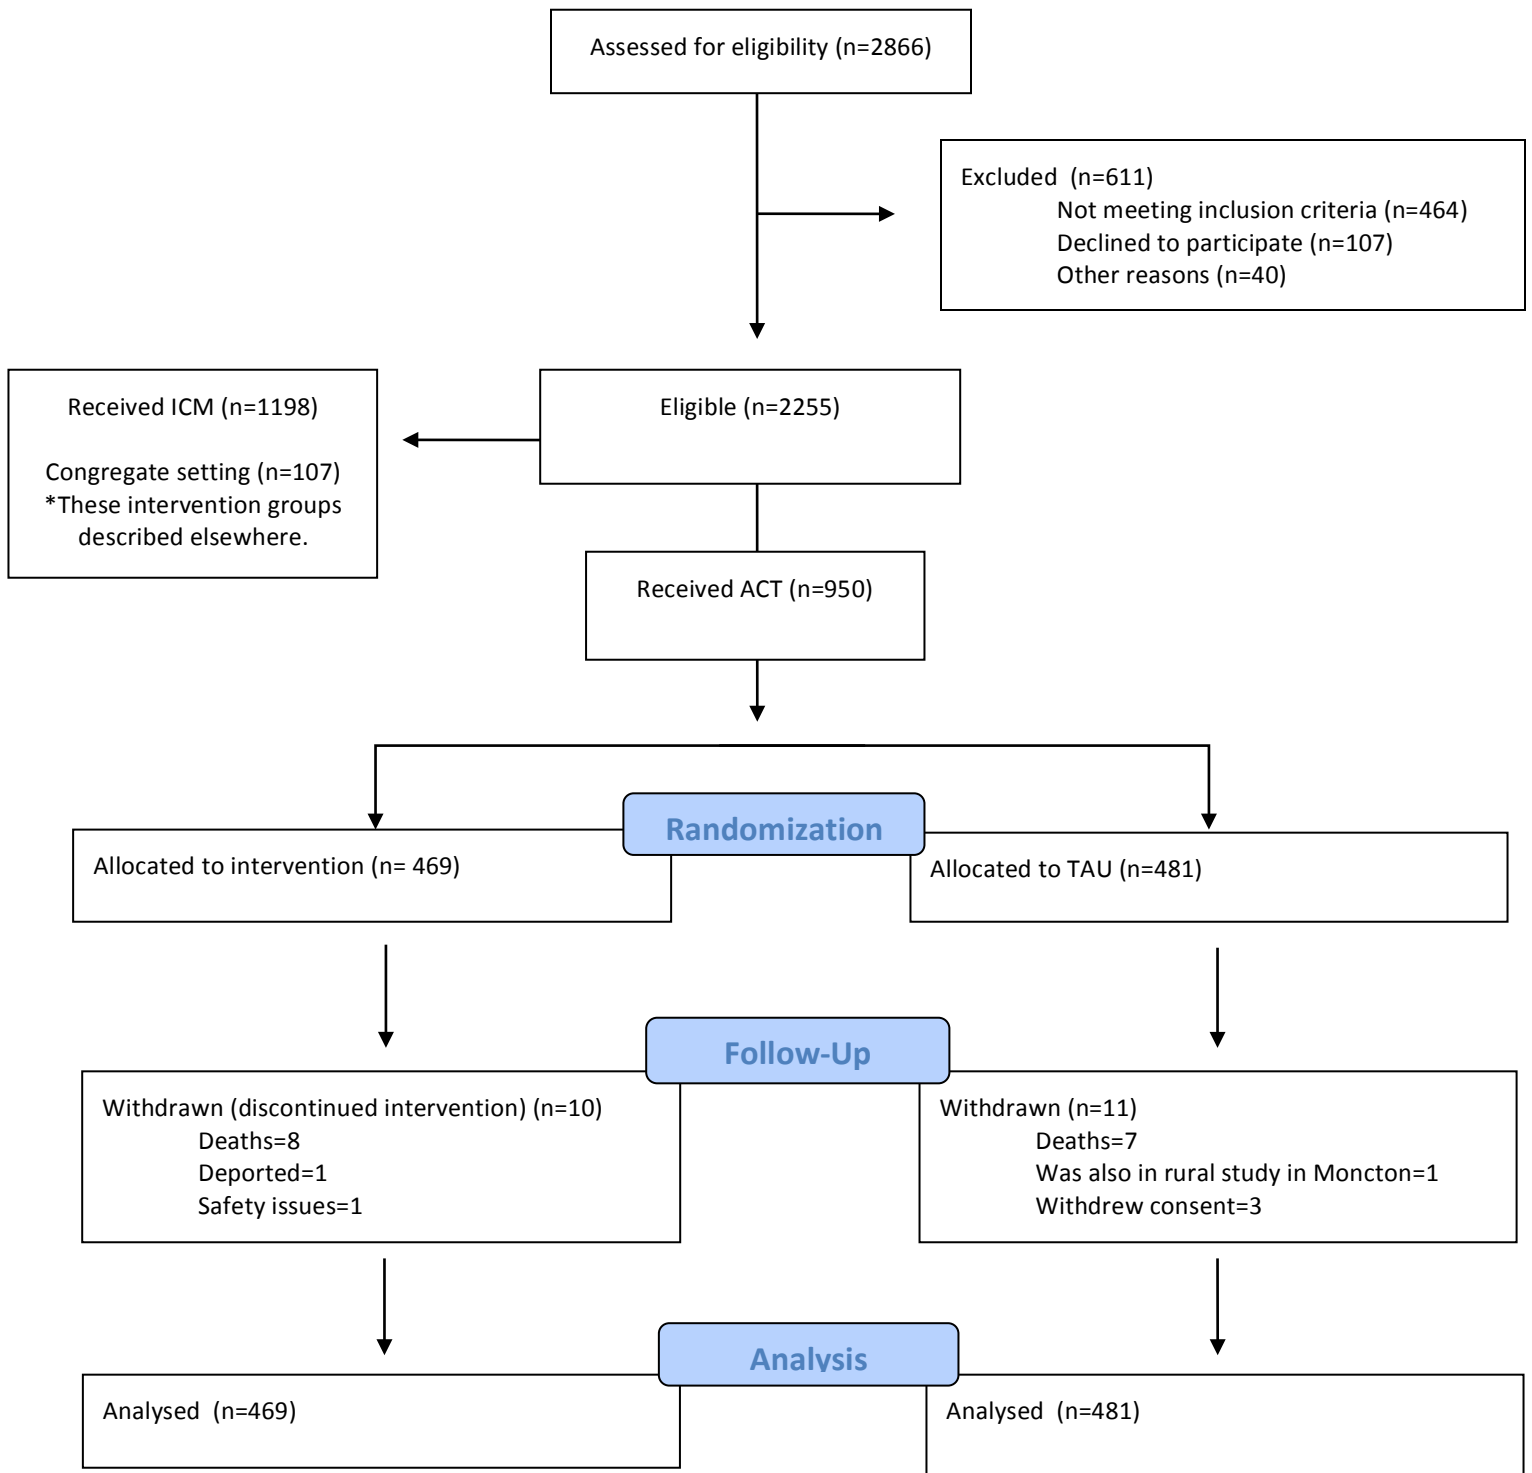

Supplement: appi.ps.201400587.ds001.pdf [file appi.ps.201400587.ds001.pdf]
